# Supplementary material for: A genetic switch controls the production of flagella and toxins in Clostridium difficile
Source: PubMed Central journal article supplement (PMC5386303; doi:10.1371/journal.pgen.1006701), 2017-03-27
Supplement: pgen.1006701.s004.pdf [file pgen.1006701.s004.pdf]

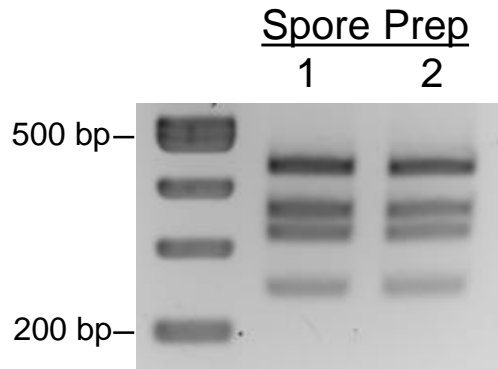

**S1 Fig. Spore stocks of *C. difficile* R20291 contain both *flg* ON and OFF bacteria.** Boiled lysates of *C. difficile* R20291 spores served as the templates in an asymmetric PCR-digestion assay with primers R591 and R857 and the restriction enzyme Swal. Shown are the results for two independent spore preparations.
