# Supplementary material for: A genetic switch controls the production of flagella and toxins in Clostridium difficile
Source: PubMed Central journal article supplement (PMC5386303; doi:10.1371/journal.pgen.1006701), 2017-03-27
Supplement: pgen.1006701.s007.pdf [file pgen.1006701.s007.pdf]

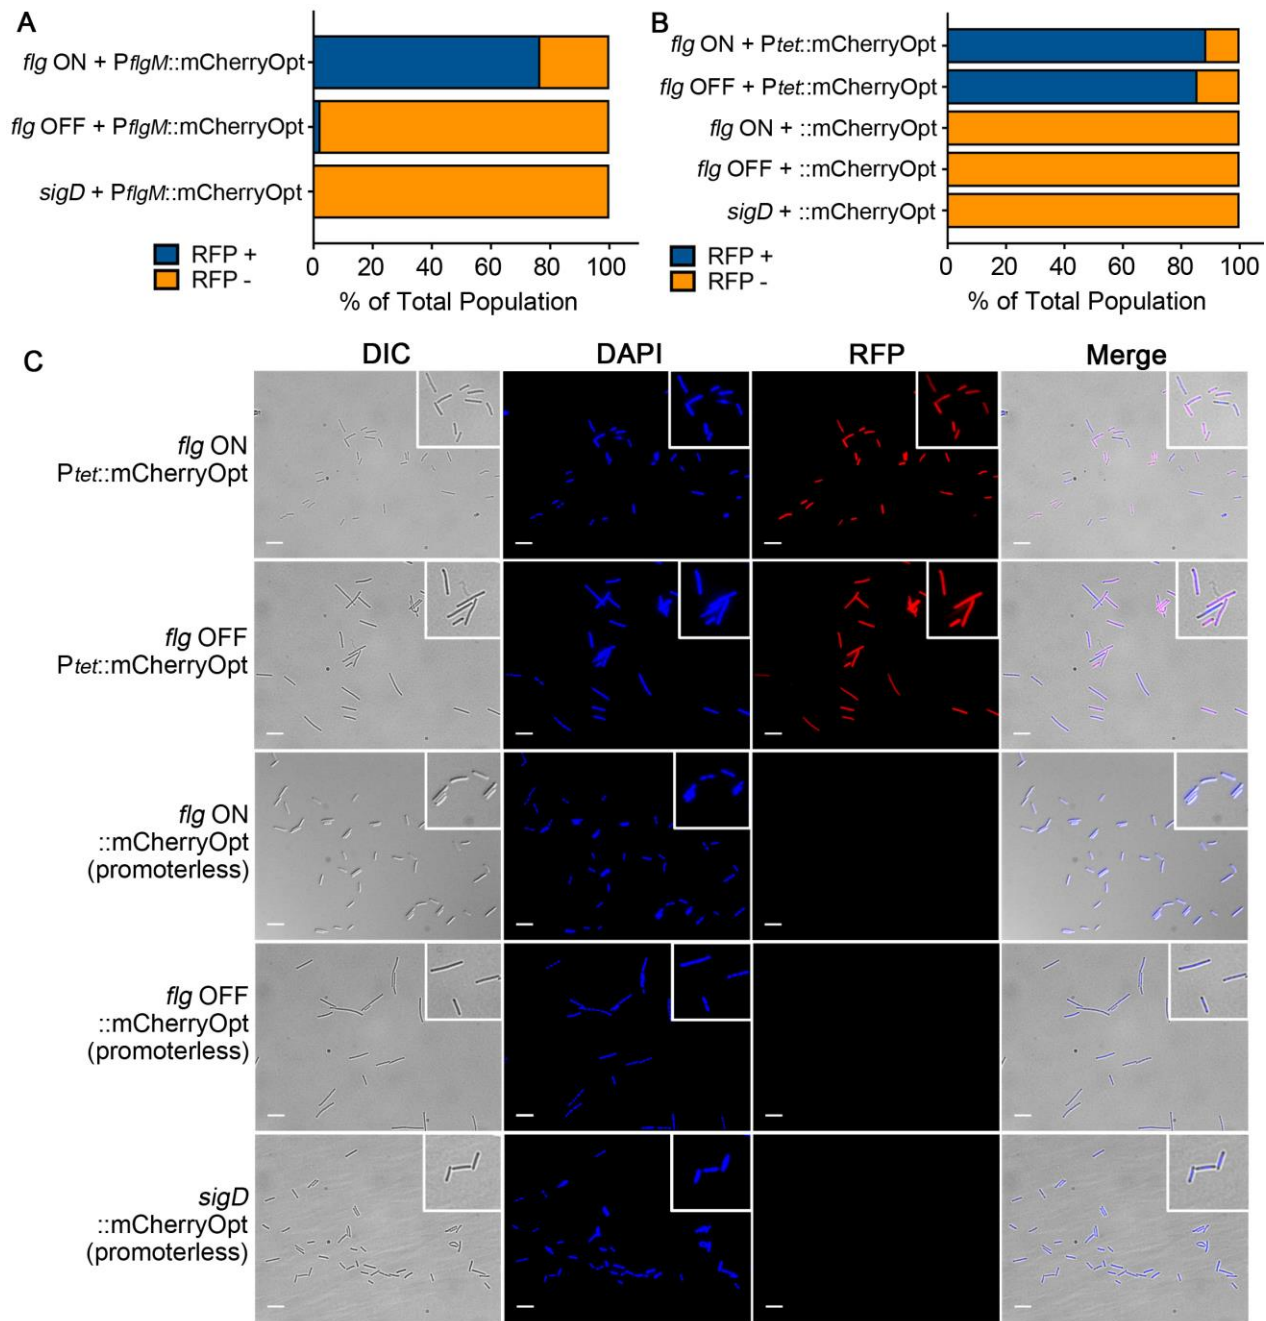

**Figure S4. Quantification and controls for fluorescence microscopy studies in Fig 4.** (A) Frequency of RFP (mCherryOpt)-positive and -negative bacteria for strains evaluated in Figure 4D. Number of bacteria counted per group transformed with  $P_{flgM}::mCherryOpt$ . *flg* ON (n=3321 bacteria; 7 biological replicates), *flg* OFF (n=3720 bacteria; 6 biological replicates), and *sigD* (n=1348, 3 biological replicates). (B) Frequency of RFP (mCherryOpt)-positive and -negative bacteria of strains in panel C. Number of bacteria counted per group transformed with  $P_{Tet}::mCherryOpt$ . *flg* ON (n=662 bacteria; 3 biological replicates) and *flg* OFF (n=401 bacteria; 3 biological replicates). Number of bacteria counted per group transformed with promoterless  $::mCherryOpt$ . *flg* ON (n=964 bacteria; 3 biological replicates), *flg* OFF (n=772 bacteria; 3 biological replicates), and *sigD* (n=670, 3 biological replicates). (C) Representative fluorescence micrographs for the indicated strains containing fusions of mCherryOpt to the  $P_{tet}$  promoter (+ ATc, positive control) or promoterless mCherryOpt (negative controls). White bar = 10 microns. The channels used are indicated at the top.
