# Supplementary material for: A genetic switch controls the production of flagella and toxins in Clostridium difficile
Source: PubMed Central journal article supplement (PMC5386303; doi:10.1371/journal.pgen.1006701), 2017-03-27
Supplement: pgen.1006701.s010.pdf [file pgen.1006701.s010.pdf]

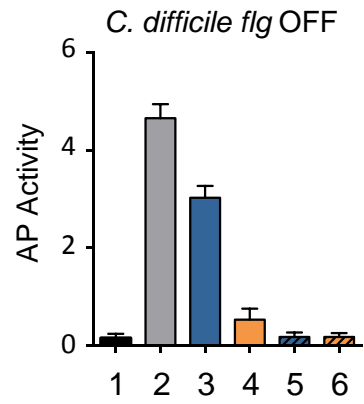

**S7 Fig. Alkaline phosphatase activity of the *phoZ* gene reporters in *C. difficile flg OFF*.** Activity was assessed as described in the main text in parallel with the same reporters in the R20291 *flg ON* background.
