# Supplementary material for: A genetic switch controls the production of flagella and toxins in Clostridium difficile
Source: PubMed Central journal article supplement (PMC5386303; doi:10.1371/journal.pgen.1006701), 2017-03-27
Supplement: pgen.1006701.s011.pdf [file pgen.1006701.s011.pdf]

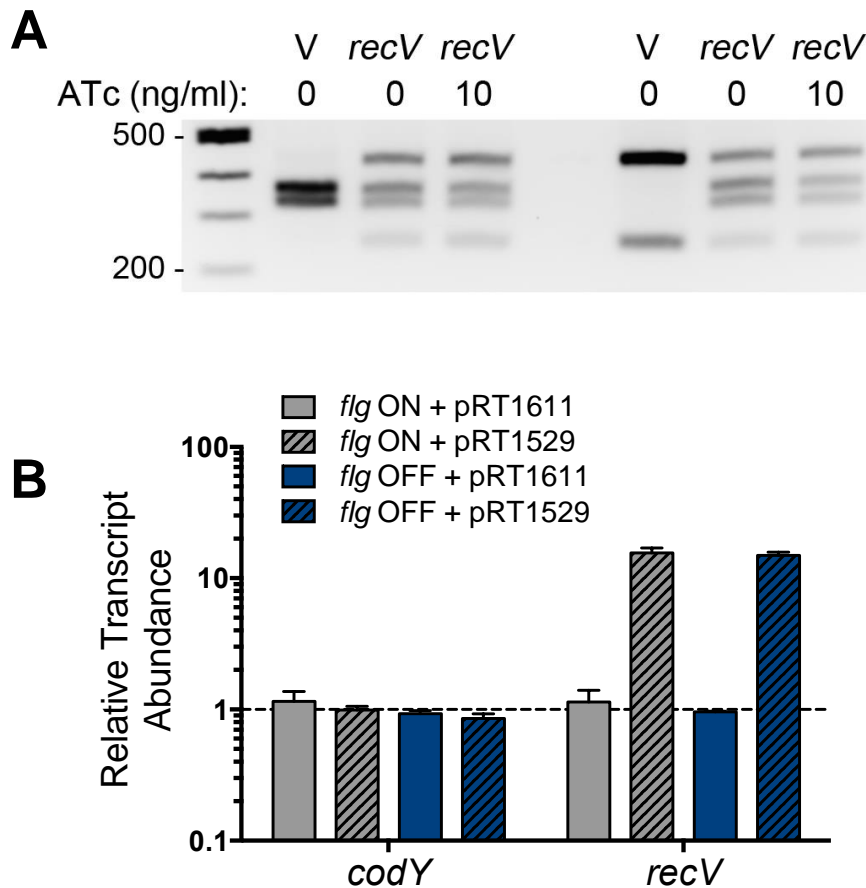

**S8 Fig. Expression of *recV* in *C. difficile* *flg* ON and *flg* OFF isolates stimulates inversion of the flagellar switch.** (A) Asymmetric PCR-digestion assay of products from *C. difficile* R20291 *flg* ON and OFF isolates transformed with pRT1611 (V, vector), or pRT1529 (pRPF185::*recV*), grown with or without 10 ng/ml ATc (S1 Table). (B) Increased transcription of *recV* occurs in *C. difficile* with pRT1529 in the absence of ATc induction. qRT-PCR measuring transcript abundance of *recV* and *codY* control gene in R20291 *flg* ON and OFF, each with pRT1611 (vector) and RT1529 (*recV*). Data were normalized to the *rpoC* gene and expressed relative to the respective parental strain with pRT1611. Shown are means and standard deviations.
