# Supplementary material for: A genetic switch controls the production of flagella and toxins in Clostridium difficile
Source: PubMed Central journal article supplement (PMC5386303; doi:10.1371/journal.pgen.1006701), 2017-03-27
Supplement: pgen.1006701.s014.pdf [file pgen.1006701.s014.pdf]

|             |                              |                                 |                        |                |                        |     |
|-------------|------------------------------|---------------------------------|------------------------|----------------|------------------------|-----|
| 630         | AAGTTACTATTTTACAAAAA-        | GAGCAACTTTTCGAAGAAATATTTAAATAC  | CATATTTAAAATTTT        | 64             |                        |     |
| BI9         | AAGTTACTATTTTACAAAAAA        | GAGCAACTTTTCGAAGAAATATTTAAATAC  | CATATTTAAAATTTT        | 65             |                        |     |
| M68         | AAGTTACTATTTTACAAAAAA        | GAGCAACTTTTTGAAGAAATATTTAAATAC  | CATATTTAAAATTTT        | 65             |                        |     |
| CF5 Inverse | AAGTTACTATTTTACAAAAAA        | GAGCAACTTTTTGAAGAAATATTTAAATAC  | CATATTTAAAATTTT        | 65             |                        |     |
| R20291      | AAGTTACTATTTTACAAAAAA        | AGGCAACTTTTATAAAGAAATATTTAAATTT | TATATTTAAAATATTT       | 65             |                        |     |
| CD196       | AAGTTACTATTTTACAAAAAA        | AGGCAACTTTTATAAAGAAATATTTAAATTT | TATATTTAAAATATTT       | 65             |                        |     |
| BI1 Inverse | AAGTTACTATTTTACAAAAAA        | AGGCAACTTTTATAAAGAAATATTTAAATTT | TATATTTAAAATATTT       | 65             |                        |     |
| 2007855     | AAGTTACTATTTTACAAAAAA        | AGGCAACTTTTATAAAGAAATATTTAAATTT | TATATTTAAAATATTT       | 65             |                        |     |
|             |                              |                                 |                        |                |                        |     |
| 630         | TTATATTTTCATGGGACTTCATTAAAAA | AAATATTAGTTTTCTTACTAAAAT        | TGATACATTATTGTATT      | 131            |                        |     |
| BI9         | TTATATTTTCATGGGACTTCATTGAAAA | AAATATTAGTTTTCTTACTAAAAT        | TGATACATTATTGTATT      | 132            |                        |     |
| M68         | TTATATTTTCATGGGACTTCATTGAAAA | AAATATTAGTTTTCTTACTAAAAT        | TGATACATTATTGTATT      | 132            |                        |     |
| CF5 Inverse | TTATATTTTCATGGGACTTCATTGAAAA | AAATATTAGTTTTCTTACTAAAAT        | TGATACATTATTGTATT      | 132            |                        |     |
| R20291      | TTATATTTTATTAGGATTTACGAAAAT  | TAATATTAGTTTTCTTACC             | CAAAGTGATACATTATTATATT | 132            |                        |     |
| CD196       | TTATATTTTATTAGGATTTACGAAAAT  | TAATATTAGTTTTCTTACC             | CAAAGTGATACATTATTATATT | 132            |                        |     |
| BI1 Inverse | TTATATTTTATTAGGATTTACGAAAAT  | TAATATTAGTTTTCTTACC             | CAAAGTGATACATTATTATATT | 132            |                        |     |
| 2007855     | TTATATTTTATTAGGATTTACGAAAAT  | TAATATTAGTTTTCTTACC             | CAAAGTGATACATTATTATATT | 132            |                        |     |
|             |                              |                                 |                        |                |                        |     |
| 630         | AATGTAATG                    | GAAATGCC                        | GATTAATTTAAAT          | AAATAAAGAAGTCA | TT-TTTTGTAATATAGCAACTT | 195 |
| BI9         | AATGTAATG                    | GAAATGCC                        | GATTAATTTAAAT          | GAATAAAGAAGTCA | TTTTTTGTAATATAGCAACTT  | 196 |
| M68         | AATGTAATG                    | GAAATGCC                        | GATTAATTTAAAT          | GAATAAAGAAGTCA | TTTTTTGTAATATAGCAACTT  | 196 |
| CF5 Inverse | AATGTAATG                    | GAAATGCC                        | GATTAATTTAAAT          | GAATAAAGAAGTCA | TTTTTTGTAATATAGCAACTT  | 196 |
| R20291      | AATGTAATG                    | GAAATGTAATTAATTT                | GGATGAATAAAGAAGTCA     |                | TTTTTTGTAATATAGCAACTT  | 196 |
| CD196       | AATGTAATG                    | GAAATGTAATTAATTT                | GGATGAATAAAGAAGTCA     |                | TTTTTTGTAATATAGCAACTT  | 196 |
| BI1 Inverse | AATGTAATG                    | GAAATGTAATTAATTT                | GGATGAATAAAGAAGTCA     |                | TTTTTTGTAATATAGCAACTT  | 196 |
| 2007855     | AATGTAATG                    | GAAATGTAATTAATTT                | GGATGAATAAAGAAGTCA     |                | TTTTTTGTAATATAGCAACTT  | 196 |

**S11 Fig. Sequence alignment of the flagellar switch and inverted repeat sequences from NCBI accessible genomes of *C. difficile*.** The following *C. difficile* genomes were used in a sequence alignment with Clustal Omega for the flagellar switch: 630, BI9, M68, CF5, R20291, CD196, BI1, and 2007855.
